# Supplementary material for: Nanocomposites of poly(l-methionine), carbon nanotube–graphene complexes and Au nanoparticles on screen printed carbon electrodes for electrochemical analyses of dopamine and uric acid in human urine solutions
Source: Royal Society of Chemistry journal article supplement (doi:10.1039/c9an02638j), 2020-01-01
Supplement: c9an02638j1.pdf [file c9an02638j1.pdf]

## **Supporting Information**

### **Nanocomposites of poly(L-methionine), carbon nanotube-graphene complexes and Au nanoparticles on screen printed carbon electrodes for electrochemical analyses of dopamine and uric acid in human urine solutions**

Yunpei Si,<sup>a</sup> Yae Eun Park,<sup>b</sup> Ji Eun Lee,<sup>b</sup> Hye Jin Lee\*<sup>a</sup>

*<sup>a</sup>Department of Chemistry and Green-Nano Materials Research Center, Kyungpook National University, 80 Daehakro, Buk-gu, Daegu-city, 41566, Republic of Korea*

*<sup>b</sup>Center for Theragnosis, Biomedical Research Institute, Korea Institute of Science and Technology, 5. Hwarang-ro 14-gil, Seongbuk-gu, Seoul 02792, Republic of Korea*

*\*Corresponding author:*

*Hye Jin Lee, E-mail address: [hyejinlee@knu.ac.kr](mailto:hyejinlee@knu.ac.kr); Tel. + 82 053 950 5336; Fax +82 053 950 6330; Postal address: Department of Chemistry and Green-Nano Materials Research Center, Kyungpook National University, 80 Daehakro, Buk-gu, Daegu-city, 41566, Republic of Korea*

## Supporting Figures and Tables

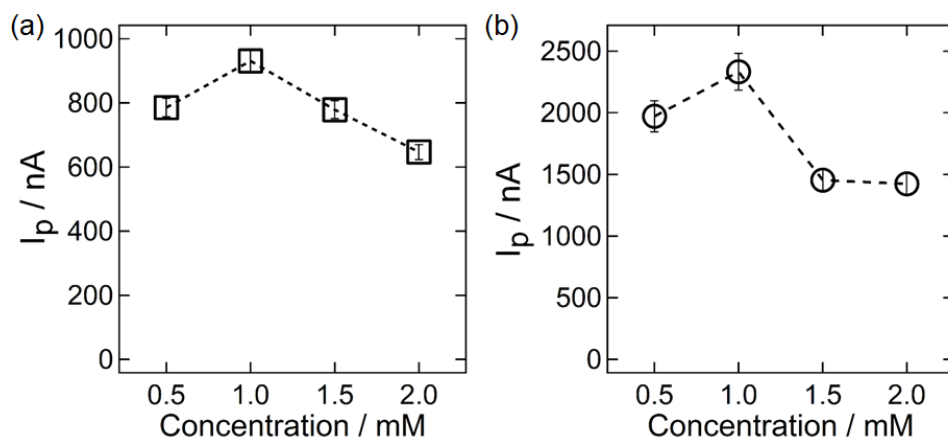

**Fig. S1** DPV peak current responses versus  $\text{HAuCl}_4$  concentrations from 0.5 to 2 mM used for Au NPs-CNT-G-pMet-SPCE fabrication. Concentrations of DA (a) and UA (b) were 2 and 20  $\mu\text{M}$  in 0.1 M PB pH 7.0, respectively.

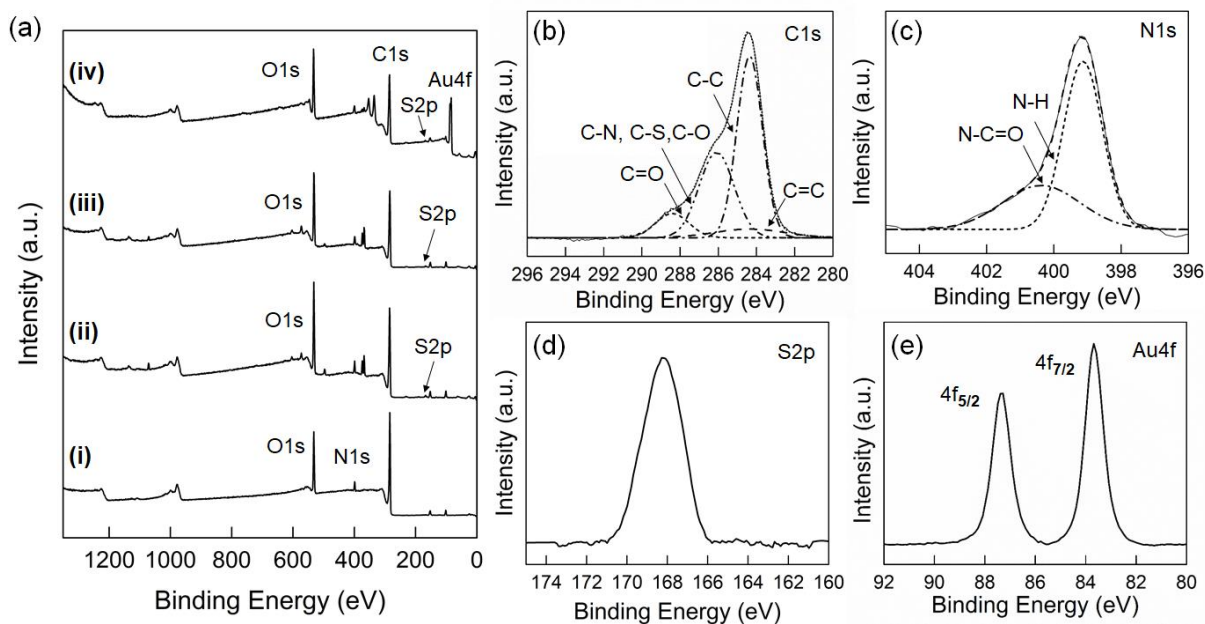

**Fig. S2** (a) XPS survey spectra of (i) oxygen plasma treated SPCE, (ii) pMet-SPCE, (iii) CNT-G-pMet-SPCE, and (iv) Au-CNT-G-pMet-SPCE. A series of XPS spectra of (b)  $\text{C}1\text{s}$ , (c)  $\text{N}1\text{s}$ , (d)  $\text{S}2\text{p}$ , and (e)  $\text{Au}4\text{f}$  for Au-CNT-G-pMet-SPCE.

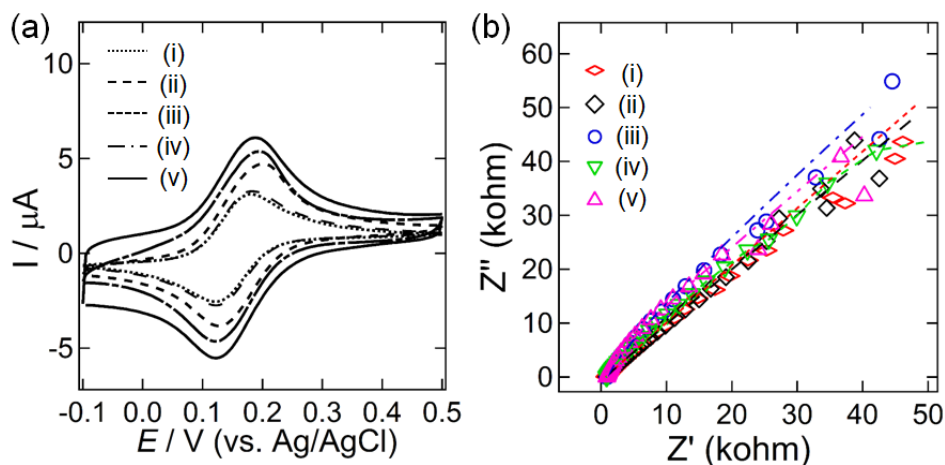

**Fig. S3** Representative (a) CVs and (b) EIS for 1 mM FcMeOH in 0.1 M KCl solution on different electrodes: (i) bare SPCE, (ii) oxygen plasma treated SPCE, (iii) pMet-SPCE, (iv) CNT-G-pMet-SPCE, and (v) Au NPs-CNT-G-pMet-SPCE. Scan rate of 50 mV s<sup>-1</sup>.

**Table S1** Comparison of the electroactive surface area and peak to peak separation ( $\Delta E_p$ ) of different electrode configurations using  $[Fe(CN)_6]^{3-/4-}$  and FcMeOH.

| Electrode                       | $[Fe(CN)_6]^{3-/4-}$            |                   | FcMeOH                          |                   |
|---------------------------------|---------------------------------|-------------------|---------------------------------|-------------------|
|                                 | Surface area (cm <sup>2</sup> ) | $\Delta E_p$ / mV | Surface area (cm <sup>2</sup> ) | $\Delta E_p$ / mV |
| (i) Bare SPCE                   | 3.13x10 <sup>-2</sup>           | 190               | 1.80x10 <sup>-2</sup>           | 64.0              |
| (ii) Oxygen plasma treated SPCE | 2.11x10 <sup>-2</sup>           | 420               | 1.87x10 <sup>-2</sup>           | 64.0              |
| (iii) pMet-SPCE                 | 3.18x10 <sup>-2</sup>           | 140               | 2.55x10 <sup>-2</sup>           | 74.0              |
| (iv) CNT-G-pMet-SPCE            | 3.50x10 <sup>-2</sup>           | 68.0              | 2.74x10 <sup>-2</sup>           | 68.0              |
| (v) Au NPs-CNT-G-pMet-SPCE      | 5.78x10 <sup>-2</sup>           | 63.0              | 2.92x10 <sup>-2</sup>           | 68.0              |

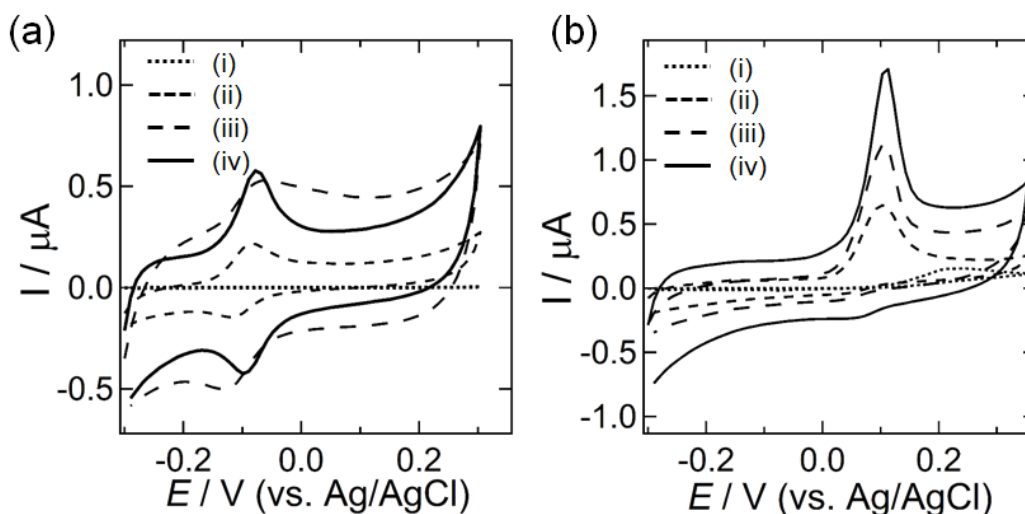

**Fig. S4** Representative CV for (a) 2  $\mu\text{M}$  DA and (b) 20  $\mu\text{M}$  UA in 0.1 M PB (pH 7.0) using different electrodes: (i) bare SPCE, (ii) pMet-SPCE, (iii) CNT-G-pMet-SPCE, and (iv) Au NPs-CNT-G-pMet-SPCE. Scan rate of 50  $\text{mV s}^{-1}$ .

**Table S2** Comparison of background corrected CV peak currents for (a) 2  $\mu\text{M}$  DA and (b) 20  $\mu\text{M}$  UA in 0.1 M PB (pH 7.0) on different electrodes: (i) bare SPCE, (ii) pMet-SPCE, (iii) CNT-G-pMet-SPCE, and (iv) Au NPs-CNT-G-pMet-SPCE.

| Electrode                   | $I_p$ / nA (DA) | $I_p$ / nA (UA) |
|-----------------------------|-----------------|-----------------|
| (i) Bare SPCE               | 12.70           | 151.0           |
| (ii) pMet-SPCE              | 172.0           | 596.0           |
| (iii) CNT-G-pMet-SPCE       | 307.0           | 968.0           |
| (iv) Au NPs-CNT-G-pMet-SPCE | 404.0           | 1460            |

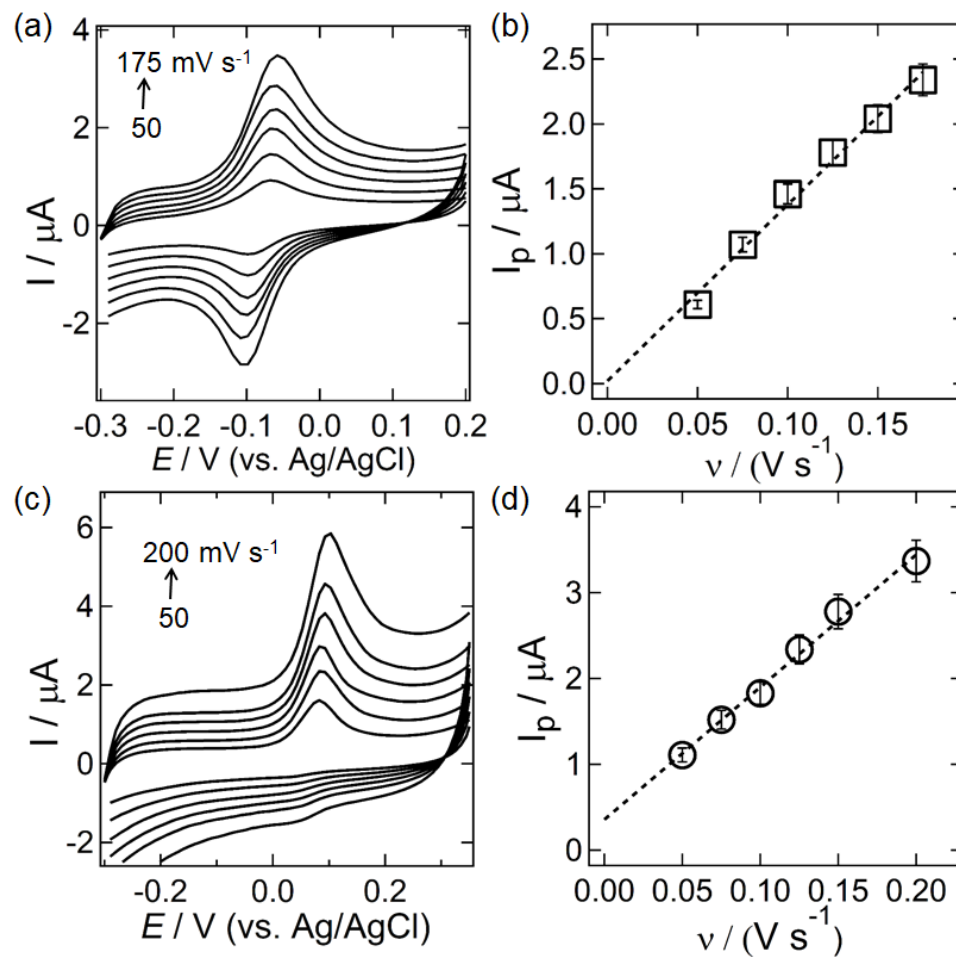

**Fig. S5** Representative CVs for (a) 3  $\mu\text{M}$  DA and (c) 20  $\mu\text{M}$  UA in 0.1 M PB (pH 7.0) using Au NPs-CNT-G-pMet-SPCE at different scan rates. (b) and (d) were linear plots of the background corrected DA and UA anodic peak current ( $I_p$ ) versus scan rate ( $v$ ).

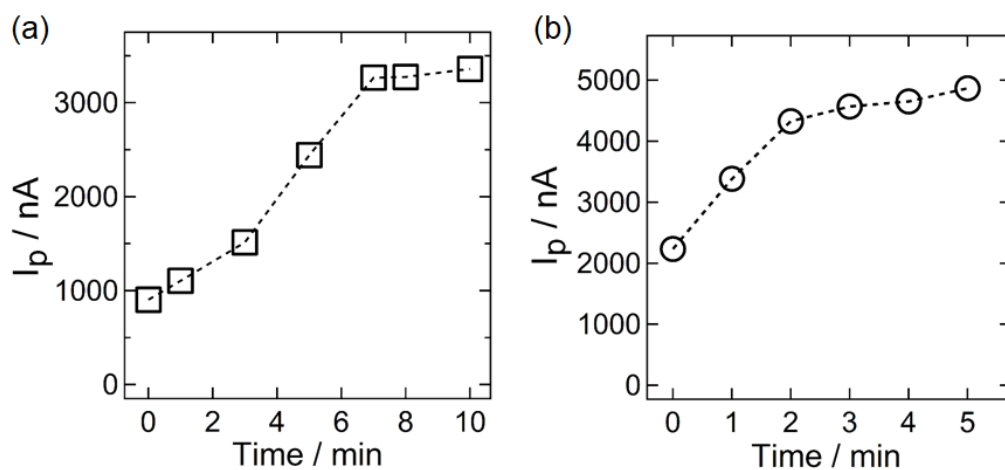

**Fig. S6** DPV peak current responses versus waiting time used for (a) 2  $\mu$ M DA and (b) 20  $\mu$ M UA in 0.1 M PB (pH 7.0), respectively.

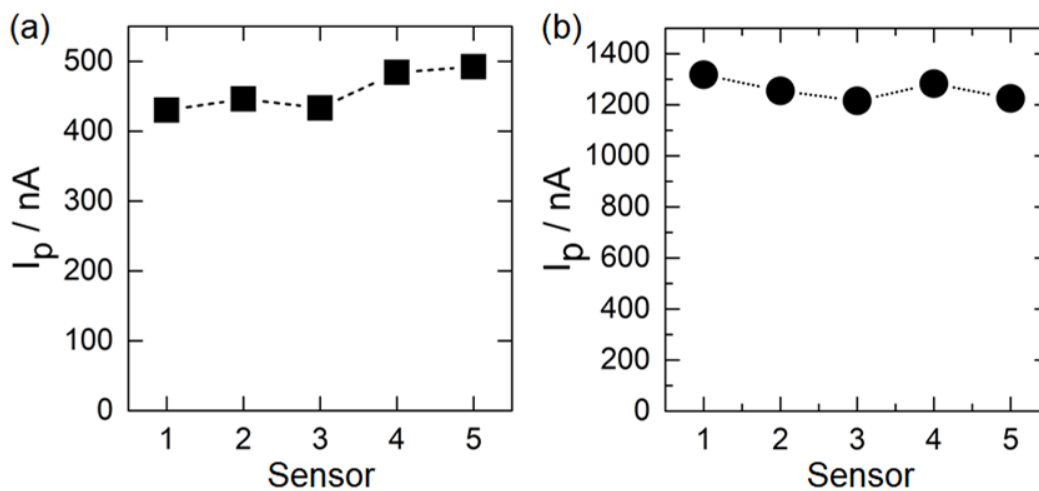

**Fig. S7** Reproducibility measurements for (a) 1  $\mu$ M DA and (b) 10  $\mu$ M UA in 0.1 M PB (pH 7.0) using Au NPs-CNT-G-pMet-SPCE.

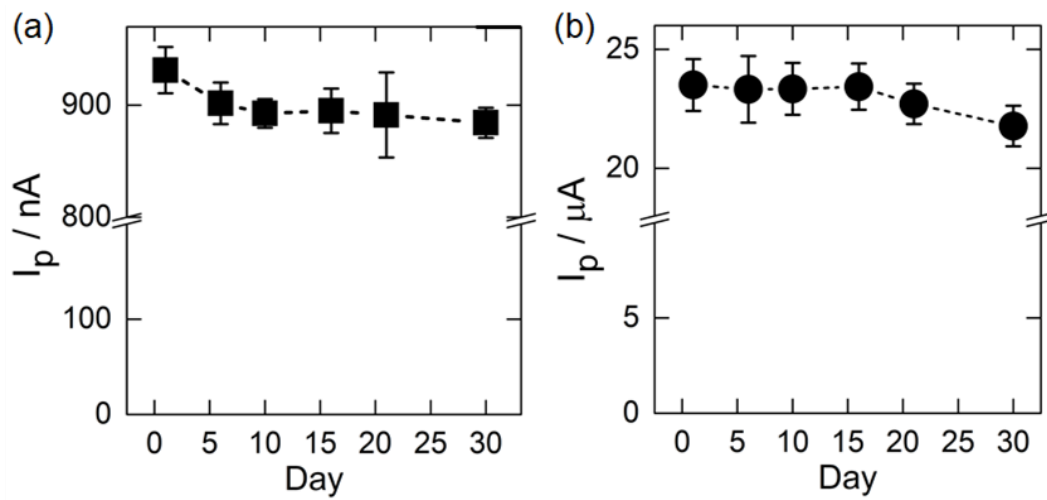

**Fig. S8** Stability measurements for (a) 2  $\mu\text{M}$  DA and (b) 20  $\mu\text{M}$  UA in 0.1 M PB (pH 7.0) using Au NPs-CNT-G-pMet-SPCE.

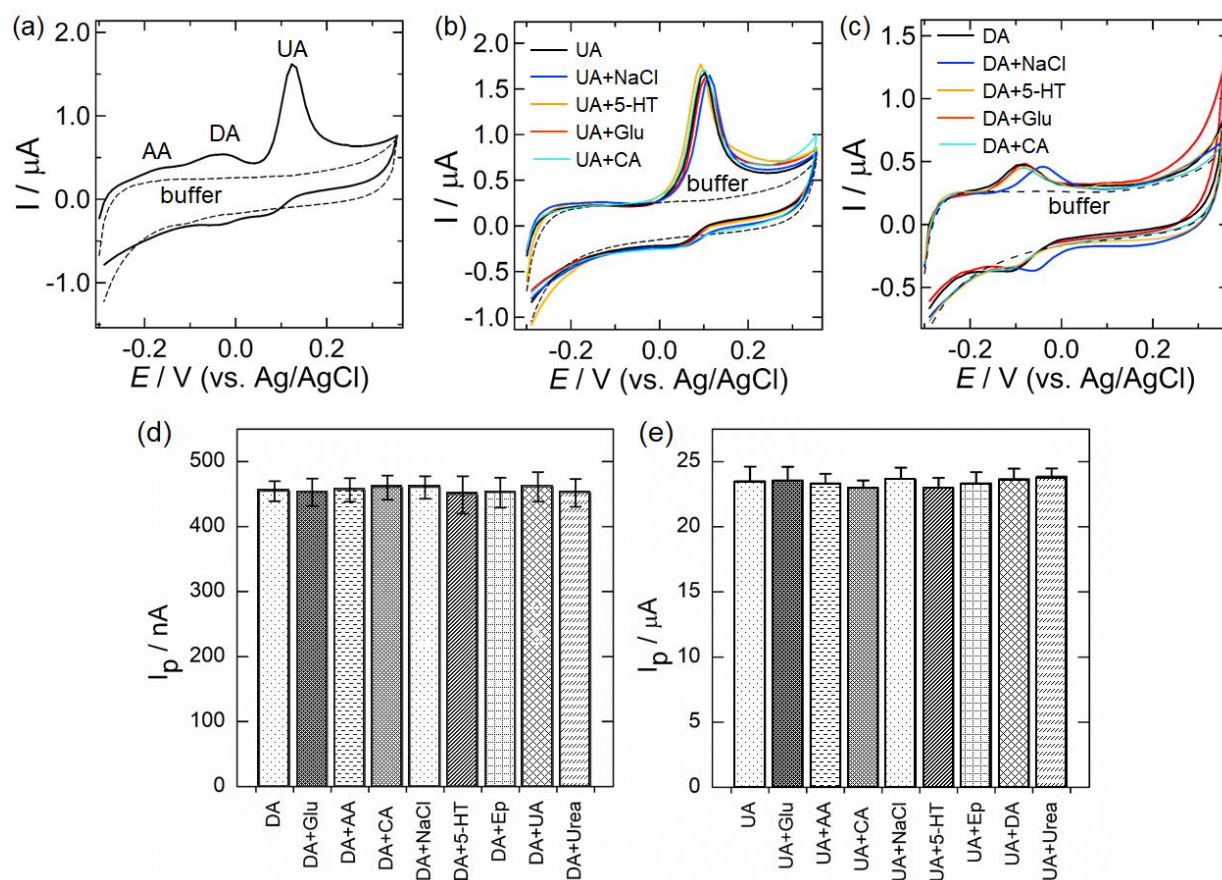

**Fig. S9** Representative CVs for (a) 1  $\mu\text{M}$  DA, 20  $\mu\text{M}$  UA, and 20  $\mu\text{M}$  AA, (b) 20  $\mu\text{M}$  UA only, and the mixture of 20  $\mu\text{M}$  UA, and interfering compounds including NaCl, 5-HT, Glu and CA, and (c) 1  $\mu\text{M}$  DA only, and the mixture of 1  $\mu\text{M}$  DA, and interfering compounds including NaCl, 5-HT, Glu, and CA in 0.1 M PB (pH 7.0) using Au NPs-CNT-G-pMet-SPCE. Concentrations of the interfering compounds were as follows: Glu (1 mM), AA (20  $\mu\text{M}$ ), CA (100  $\mu\text{M}$ ), DA (1  $\mu\text{M}$ ), NaCl (200  $\mu\text{M}$ ), and 5-HT (0.1  $\mu\text{M}$ ). DPV peak current responses of (d) 1  $\mu\text{M}$  DA only and the mixture of 1  $\mu\text{M}$  DA and various interfering compounds including Glu, AA, CA, NaCl, 5-HT, Ep, UA, and urea; (e) 20  $\mu\text{M}$  UA only and the mixture of 20  $\mu\text{M}$  UA and interfering compounds including Glu, AA, CA, NaCl, 5-HT, Ep, DA, and urea. Each interfering reagent was individually added to the DA or UA solution and tested separately. The concentrations of the reagents used were: Glu (1 mM), AA (20  $\mu\text{M}$ ), CA (100  $\mu\text{M}$ ), DA (1  $\mu\text{M}$ ), NaCl (200  $\mu\text{M}$ ), 5-HT (0.1  $\mu\text{M}$ ), Ep (0.1  $\mu\text{M}$ ), UA (20  $\mu\text{M}$ ), urea (1 mM). Each interfering compound was individually tested using CV except AA, DA, and UA tested all together.



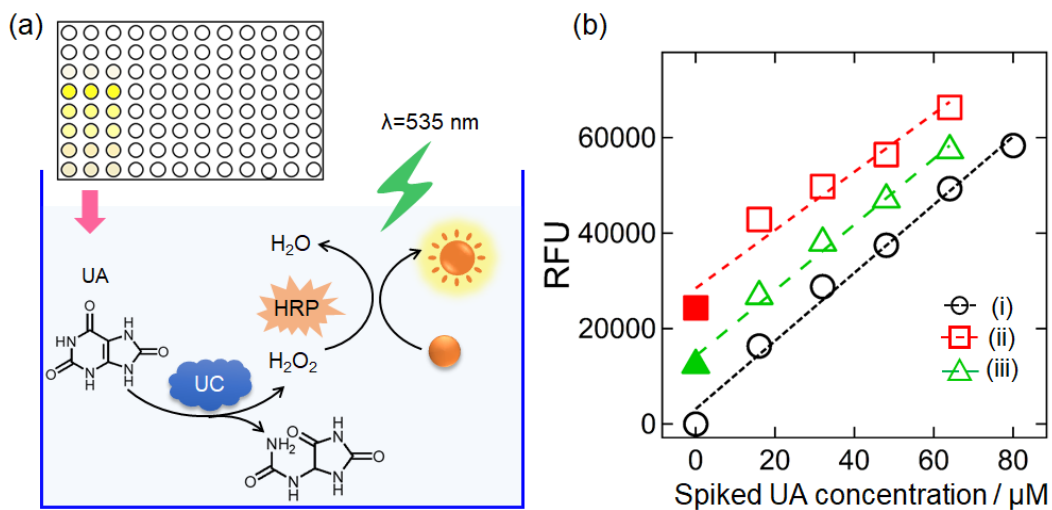

**Fig. S10** (a) Schematic showing UA detection using a commercial fluorometric assay kit. UC: uricase and HRP: horseradish peroxidase. (b) A series of linear plots for UA detection in (i) buffer, (ii) 20-fold, and (iii) 40-fold diluted human urine solutions with UA spiking concentrations from 16 to 80  $\mu\text{M}$ . The filled markers were human urine analysis itself without any spiking of UA.
